# Supplementary material for: Assessing the Assimilation of Himawari-8 observations on Aerosol Forecasts and Radiative Effects During Pollution Transport from South Asia to the Tibetan Plateau
Source: Copernicus journal article supplement (doi:10.5194/egusphere-2023-1581), 2023-08-11
Supplement: Supplementary file 1 [file egusphere-2023-1581-supplement.pdf]

**Supplement of****Assessing the Assimilation of Himawari-8 observations on Aerosol Forecasts and Radiative Effects During Pollution Transport from South Asia to the Tibetan Plateau**

Min Zhao et al.

Correspondence to: Tie Dai (daitie@mail.iap.ac.cn)

**Table S1. The summary of the abbreviations and their corresponding full names in this study.**

| <b>Abbreviation</b> | <b>Full name</b>                                                                           | <b>Abbreviation</b> | <b>Full name</b>                                          |
|---------------------|--------------------------------------------------------------------------------------------|---------------------|-----------------------------------------------------------|
| SA                  | South Asia                                                                                 | NMVOC               | volatile organic compounds                                |
| TP                  | Tibetan Plateau                                                                            | FINN                | the Fire INventory from NCAR                              |
| DA                  | data assimilation                                                                          | MEGAN               | the Model of Emissions of Gasses and Aerosols from Nature |
| AOT                 | aerosol optical thickness                                                                  | GOCART              | the Goddard Chemical Aerosol Radiation Transport          |
| WRF-Chem            | Weather Research and Forecasting-Chemistry                                                 | NCEP                | the National Centers for Environmental Prediction         |
| MODIS               | Moderate Resolution Imaging Spectroradiometer                                              | AHI                 | Advanced Himawari Imager                                  |
| AERONET             | AERosol ROBotic NETwork                                                                    | AE                  | Ångström exponent                                         |
| CCN                 | cloud condensation nuclei                                                                  | JAXA                | the Japan Aerospace Exploration Agency                    |
| BC                  | black carbon                                                                               | DT                  | the Dark Target                                           |
| GOES-8              | Goddard Earth Observing System-8                                                           | DB                  | the Deep Blue                                             |
| GOCI                | Geostationary Ocean Color Imager                                                           | SYN                 | synoptic                                                  |
| CERES               | Clouds and the Earth's Radiant Energy System                                               | BIAS                | mean bias                                                 |
| ERA5                | the fifth generation of the European Centre for Medium-Range Weather Forecasts Re-Analysis | RMSE                | root-mean-square error                                    |
| LETKF               | local ensemble transform Kalman filter                                                     | CORR                | correlation coefficient                                   |
| IC                  | initial conditions                                                                         | PDFs                | the probability distribution functions                    |

|                   |                                                         |      |                                                       |
|-------------------|---------------------------------------------------------|------|-------------------------------------------------------|
| GSI               | Gridpoint Statistical Interpolation                     | DSRc | downward solar radiation under clear-sky              |
| CBMZ              | Carbon Bond Mechanism                                   | DSR  | downward radiation flux at the surface at the all-sky |
| MOSAIC            | Model for Simulating Aerosol Interactions and Chemistry | PBLH | planetary boundary layer height                       |
| RRTMG             | Rapid Radiative Transfer Model                          | T2   | 2-m temperature                                       |
| OC                | Organic Carbon                                          | RH2  | 2-m relative humidity                                 |
| PM <sub>2.5</sub> | fine particulate matter                                 | $q$  | water vapor mixing ratio                              |
| PM <sub>10</sub>  | coarse particulate matter                               | $T$  | temperature                                           |
